# Supplementary material for: Comparison of logistic regression with machine learning methods for the prediction of fetal growth abnormalities: a retrospective cohort study
Source: Springer Nature journal article supplement (doi:10.1186/s12884-018-1971-2), 2018-08-15
Supplement: MOESM1 [file 16039544]

**Table S1:** Predictors of fetal growth abnormalities and their use in the prediction models.

| Predictors                              | Type        | Primiparae    |          | Multiparae    |          |
|-----------------------------------------|-------------|---------------|----------|---------------|----------|
|                                         |             | Pre-Pregnancy | 26 weeks | Pre-Pregnancy | 26 weeks |
| <b>Sociodemographics</b>                |             |               |          |               |          |
| Maternal age                            | Categorical | ●             | ●        | ●             | ●        |
| Common-law/married                      | Binary      | ●             | ●        | ●             | ●        |
| Area-level income quintile              | Categorical | ●             | ●        | ●             | ●        |
| Area of residence (urban/rural)         | Binary      | ●             | ●        | ●             | ●        |
| <b>Pregnancy risk factors</b>           |             |               |          |               |          |
| Smoking before pregnancy                | Binary      | ●             | ●        | ●             | ●        |
| Pre-pregnancy body mass index           | Continuous  | ●             | ●        | ●             | ●        |
| Pre-existing hypertension               | Binary      | ●             | ●        | ●             | ●        |
| Pre-existing diabetes                   | Binary      | ●             | ●        | ●             | ●        |
| <b>Past pregnancy history</b>           |             |               |          |               |          |
| Gravidity                               | Discrete    | ●             | ●        | ●             | ●        |
| Parity                                  | Discrete    |               |          | ●             | ●        |
| Previous gestational diabetes           | Binary      |               |          | ●             | ●        |
| Previous child with birthweight < 2500g | Binary      |               |          | ●             | ●        |
| Previous child with birthweight > 4080g | Binary      |               |          | ●             | ●        |
| Previous caesarean section              | Binary      |               |          | ●             | ●        |
| Previous preterm delivery < 29 weeks    | Binary      |               |          | ●             | ●        |
| Previous preterm delivery 29-32 weeks   | Binary      |               |          | ●             | ●        |
| Previous preterm delivery 33-36 weeks   | Binary      |               |          | ●             | ●        |
| Previous death of a neonate ≥ 500g      | Binary      |               |          | ●             | ●        |
| <b>Current pregnancy</b>                |             |               |          |               |          |
| Fetal sex                               | Binary      |               | ●        |               | ●        |
| Weight gain in pregnancy at 26 weeks    | Continuous  |               | ●        |               | ●        |
| Smoking during pregnancy                | Binary      |               | ●        |               | ●        |
| Substance use in pregnancy              | Binary      |               | ●        |               | ●        |
| Gestational diabetes                    | Binary      |               | ●        |               | ●        |
| Pregnancy-induced hypertension          | Binary      |               | ●        |               | ●        |
| Psychiatric disorder                    | Binary      |               | ●        |               | ●        |
