# Supplementary material for: Comparison of logistic regression with machine learning methods for the prediction of fetal growth abnormalities: a retrospective cohort study
Source: Springer Nature journal article supplement (doi:10.1186/s12884-018-1971-2), 2018-08-15
Supplement: MOESM2 [file 16039544]

**Table S2:** Training parameter grids and parameters used for five machine learning methods for the prediction of fetal growth abnormalities.

| Method | Training parameter range          | SGA           |          |               |          | LGA           |          |               |          |
|--------|-----------------------------------|---------------|----------|---------------|----------|---------------|----------|---------------|----------|
|        |                                   | Primiparae    |          | Multiparae    |          | Primiparae    |          | Multiparae    |          |
|        |                                   | Pre-pregnancy | 26 weeks | Pre-pregnancy | 26 weeks | Pre-pregnancy | 26 weeks | Pre-pregnancy | 26 weeks |
| EN     | alpha: (0:10)/100                 | 0.6           | 0.5      | 0.2           | 0.8      | 0.2           | 0.2      | 0.3           | 0.5      |
|        | lambda: (1:10)/100                | 0.02          | 0.01     | 0.05          | 0.01     | 0.07          | 0.01     | 0.01          | 0.02     |
| CT     | complexity parameter: (1:10)/1000 | 0.002         | 0.002    | 0.006         | 0.004    | 0.002         | 0.004    | 0.004         | 0.002    |
| RF     | mtry: 1:6                         | 2             | 2        | 2             | 3        | 2             | 2        | 2             | 2        |
|        | n of trees: 50, 200, 500          | 200           | 200      | 200           | 200      | 200           | 200      | 500           | 200      |
| GB     | n of trees: 200                   | 200           | 200      | 200           | 200      | 200           | 200      | 200           | 200      |
|        | interaction depth: 1:5            | 2             | 1        | 1             | 2        | 2             | 1        | 1             | 2        |
|        | shrinkage: 0.1, 0.01              | 0.01          | 0.1      | 0.1           | 0.1      | 0.01          | 0.1      | 0.1           | 0.1      |
|        | minimum node size: 10, 20         | 20            | 10       | 10            | 10       | 20            | 20       | 20            | 10       |
| NN     | decay: 0.1, 0.2, 0.5              | 0.1           | 0.2      | 0.1           | 0.5      | 0.1           | 0.2      | 0.2           | 0.5      |
|        | size: 1:5                         | 1             | 1        | 1             | 1        | 1             | 1        | 1             | 1        |

Abbreviations: *CT* classification tree, *EN* elastic net, *GB* gradient boosting, *LGA* large for gestational age, *LR* logistic regression, *mtry* number of variables randomly sampled as candidates at each split, *n* number, *NN* neural network, *RF* random forest, *SGA* small for gestational age
