# Supplementary material for: Comparison of logistic regression with machine learning methods for the prediction of fetal growth abnormalities: a retrospective cohort study
Source: Springer Nature journal article supplement (doi:10.1186/s12884-018-1971-2), 2018-08-15
Supplement: MOESM3 [file 16039544]

**Table S3:** Area under the curve in the training data for logistic regression and five machine learning methods for the prediction of fetal growth abnormalities.

| Method | SGA           |          |               |          | LGA           |          |               |          |
|--------|---------------|----------|---------------|----------|---------------|----------|---------------|----------|
|        | Primiparae    |          | Multiparae    |          | Primiparae    |          | Multiparae    |          |
|        | Pre-pregnancy | 26 weeks | Pre-pregnancy | 26 weeks | Pre-pregnancy | 26 weeks | Pre-pregnancy | 26 weeks |
| LR     | 0.599         | 0.673    | 0.714         | 0.752    | 0.627         | 0.704    | 0.707         | 0.747    |
| EN     | 0.601         | 0.672    | 0.709         | 0.749    | 0.626         | 0.705    | 0.707         | 0.744    |
| CT     | 0.614         | 0.705    | 0.688         | 0.707    | 0.641         | 0.678    | 0.670         | 0.729    |
| RF     | 0.711         | 0.822    | 0.811         | 0.880    | 0.732         | 0.855    | 0.773         | 0.838    |
| GB     | 0.613         | 0.687    | 0.734         | 0.769    | 0.634         | 0.713    | 0.714         | 0.750    |
| NN     | 0.604         | 0.674    | 0.714         | 0.753    | 0.629         | 0.701    | 0.707         | 0.747    |

Abbreviations: *CT* classification tree, *EN* elastic net, *GB* gradient boosting, *LGA* large for gestational age, *LR* logistic regression, *NN* neural network, *RF* random forest, *SGA* small for gestational age
