# Supplementary material for: Comparison of logistic regression with machine learning methods for the prediction of fetal growth abnormalities: a retrospective cohort study
Source: Springer Nature journal article supplement (doi:10.1186/s12884-018-1971-2), 2018-08-15

**EN**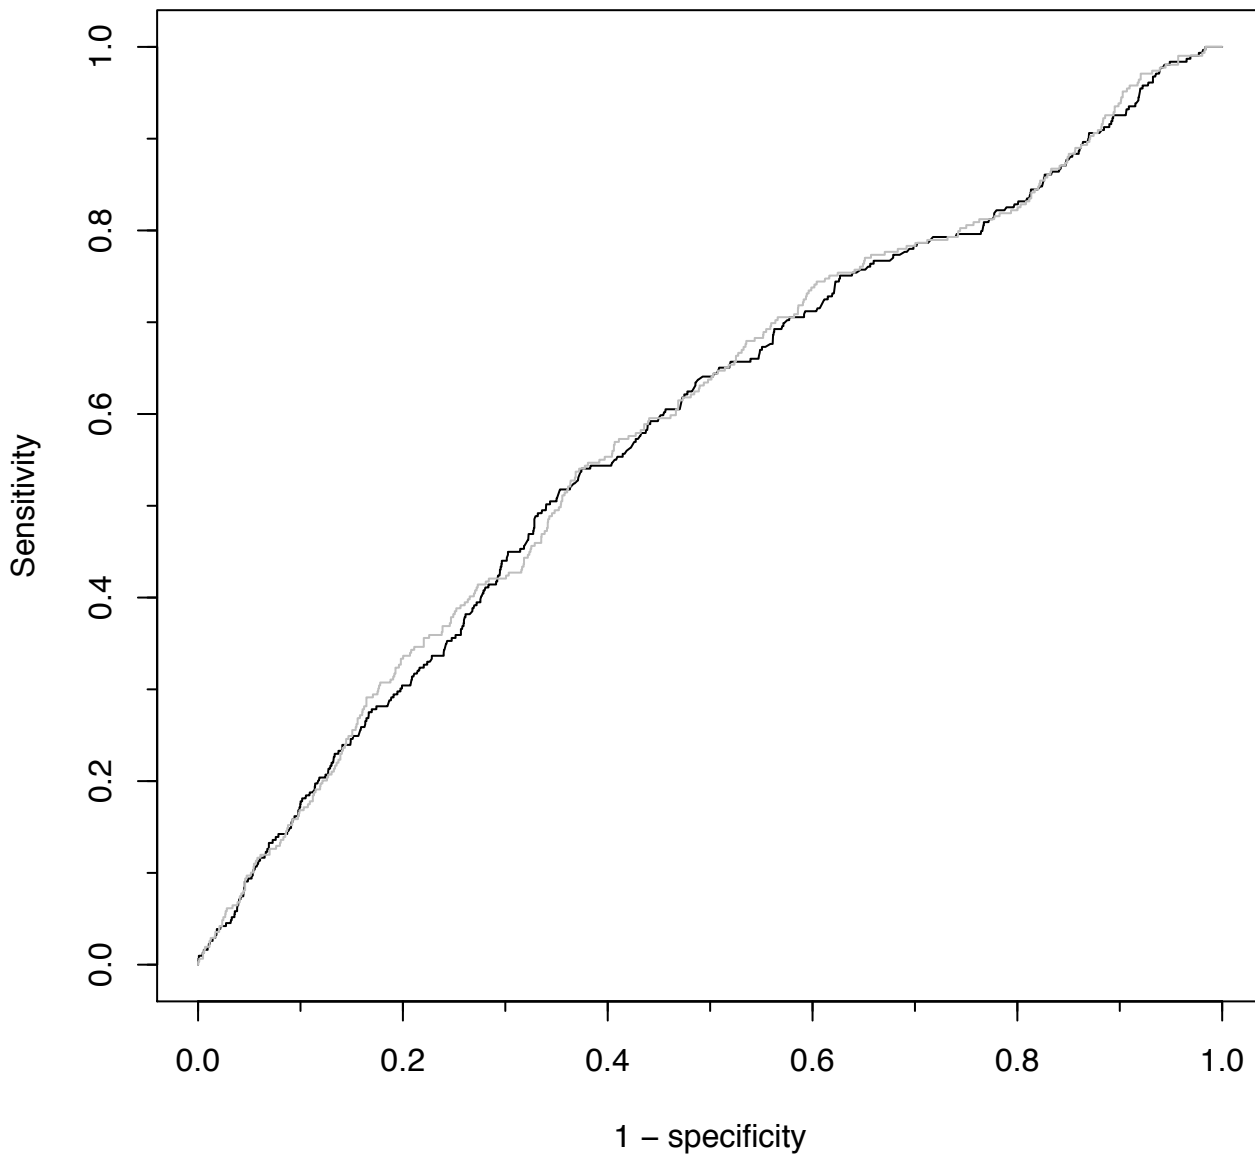**CT**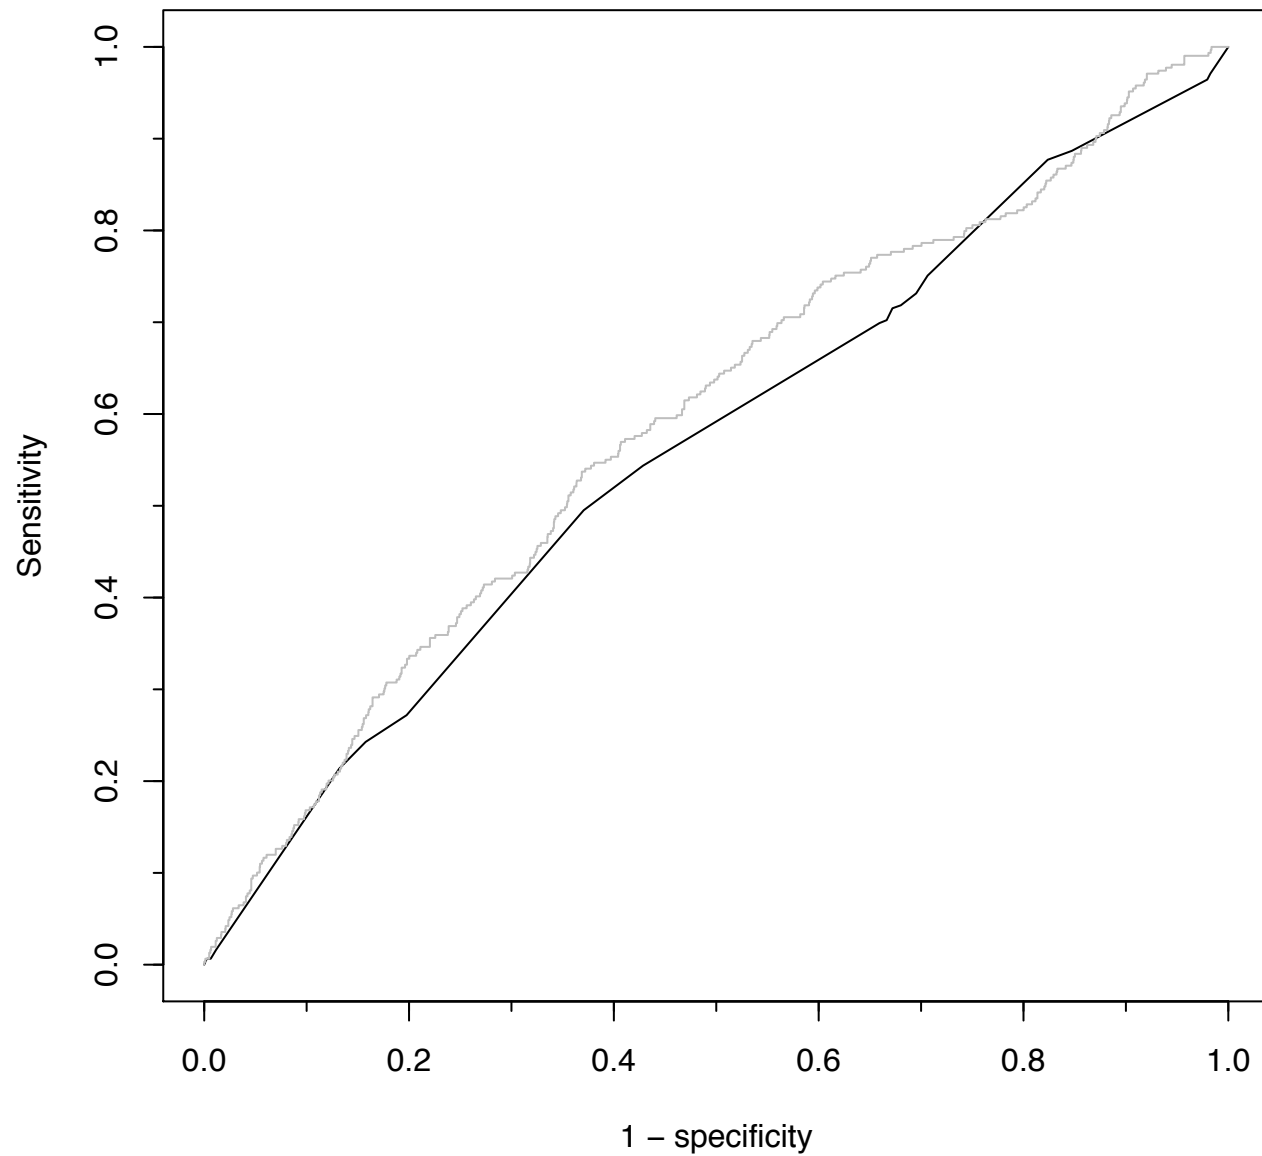**RF**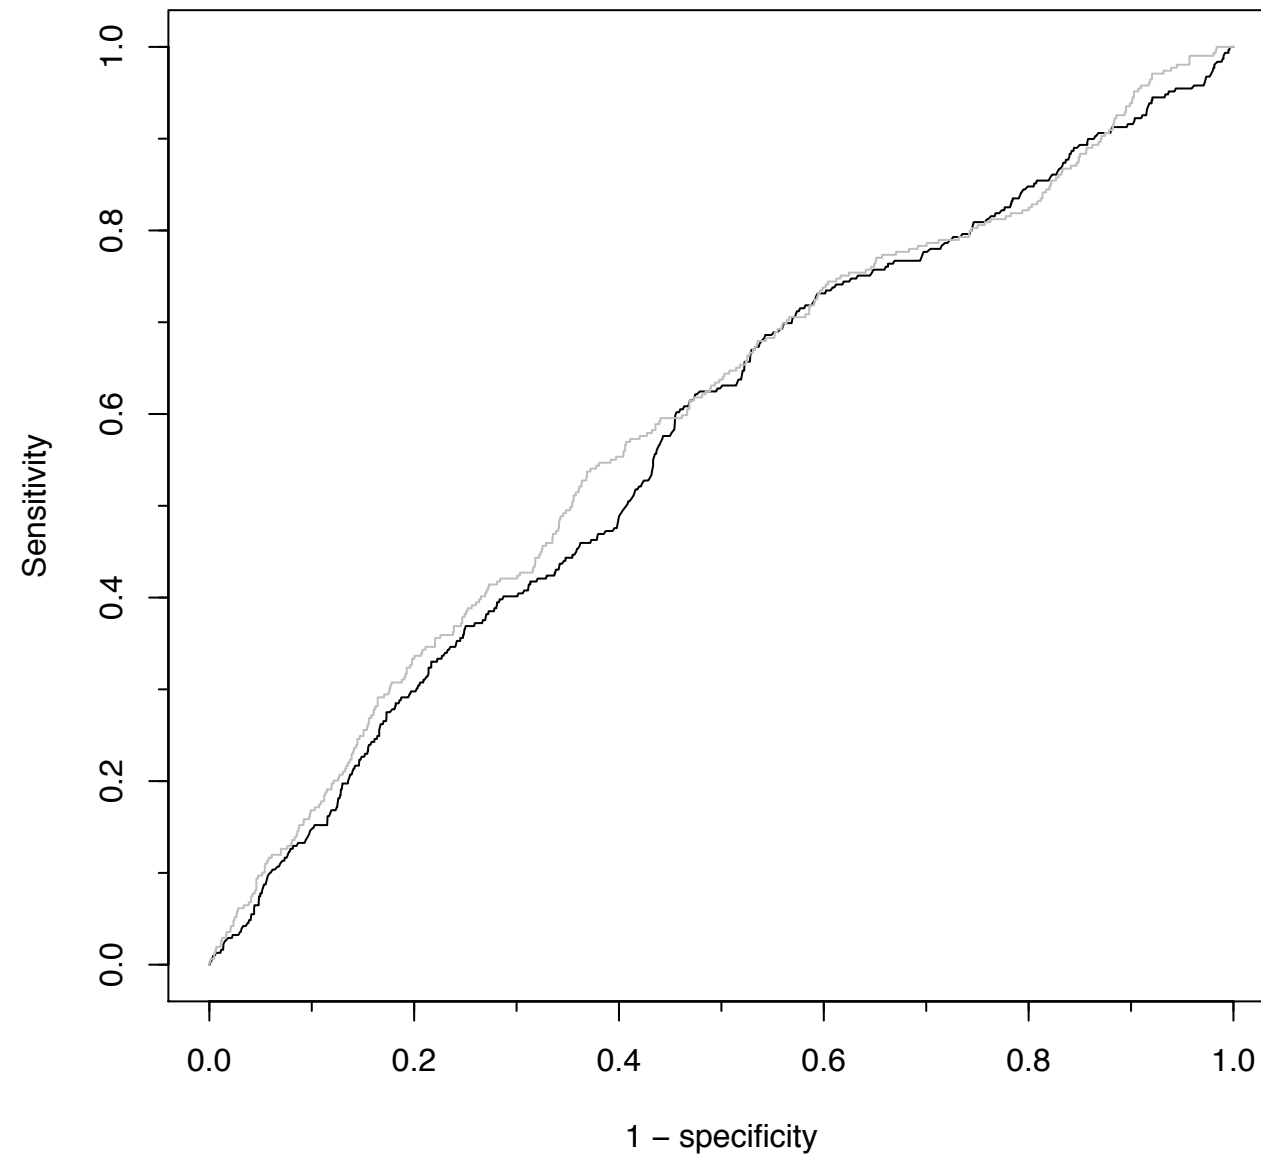**GB**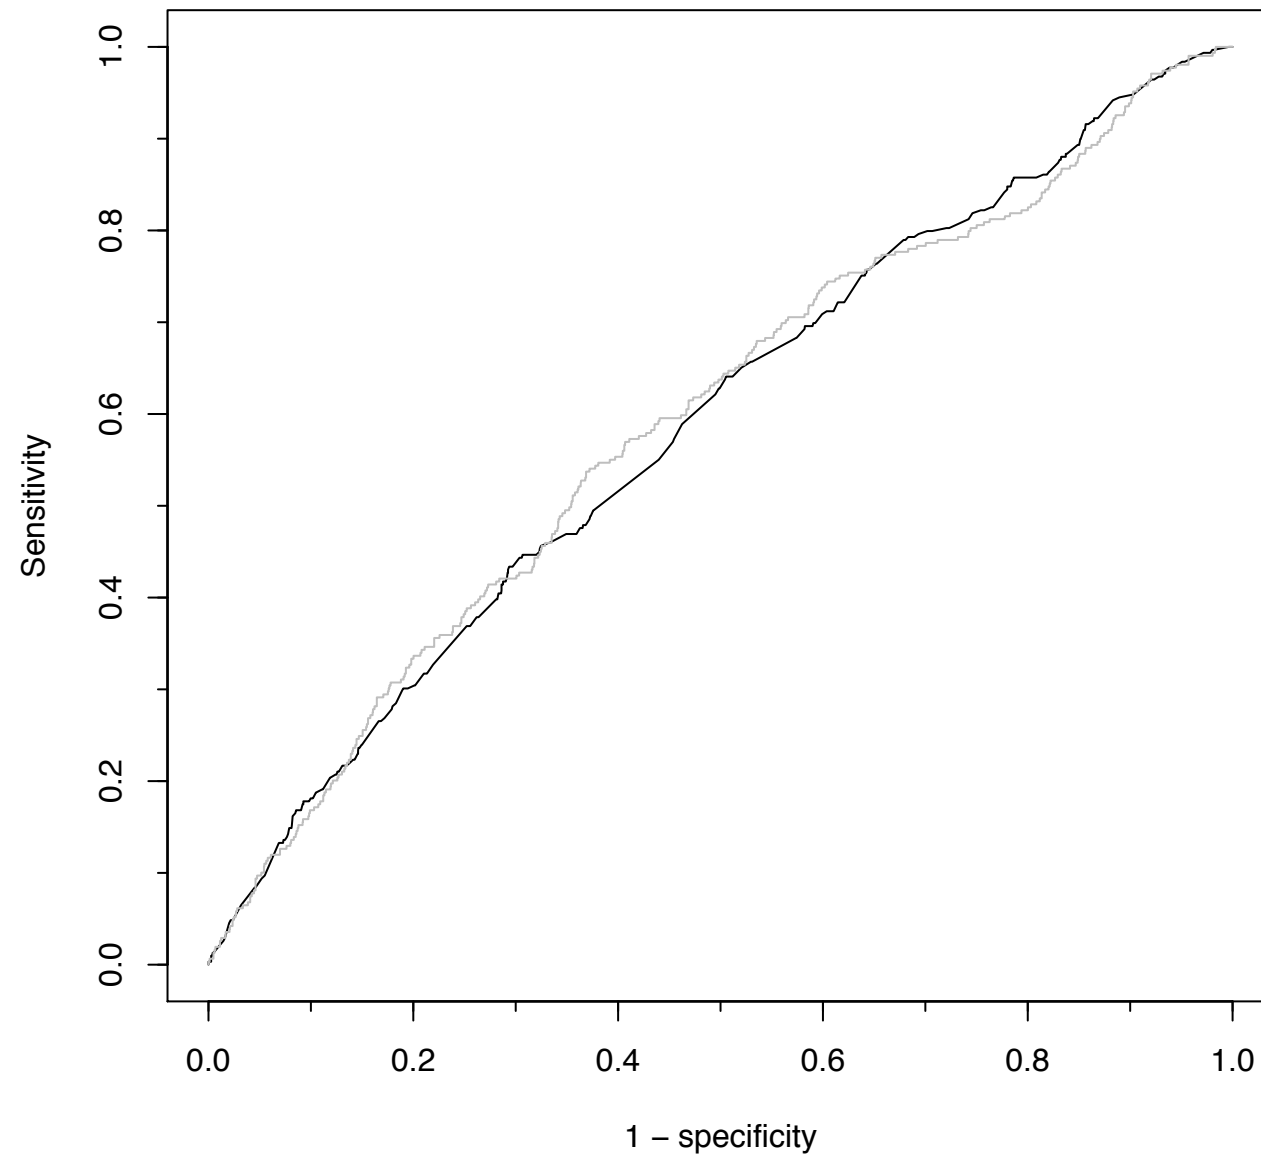**NN**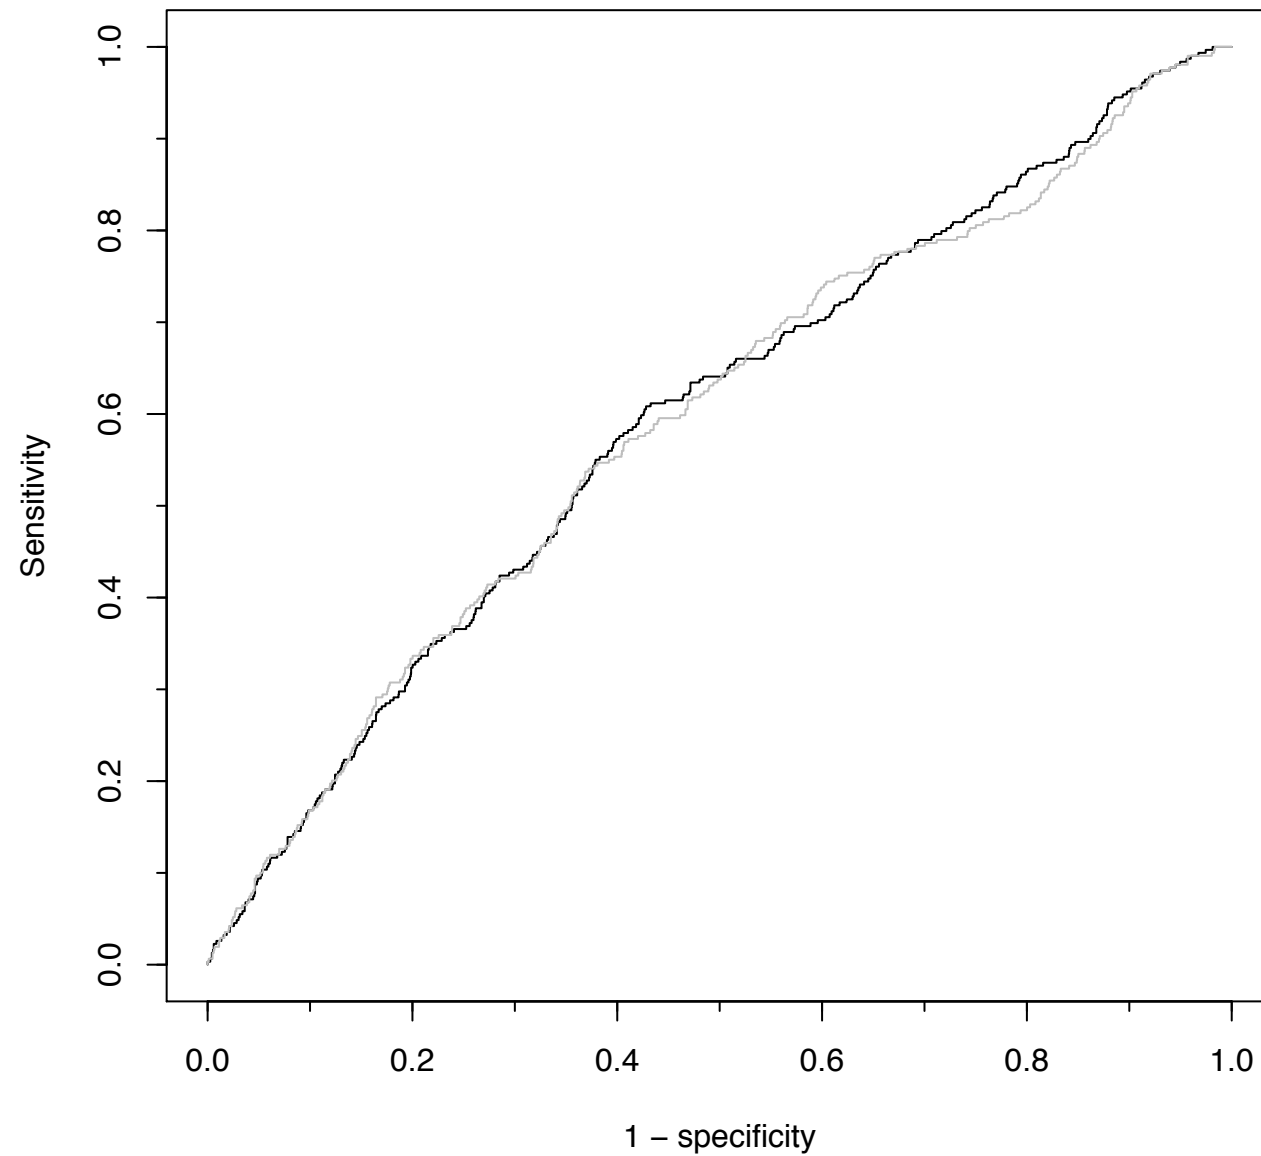

Supplement: MOESM8 [file 16039544]
